# Supplementary material for: Effect of Methyl Jasmonate Elicitation on Triterpene Production and Evaluation of Cytotoxic Activity of Mycelial Culture Extracts of Ganoderma applanatum (Pers.) Pat.
Source: MDPI journal article supplement (doi:10.3390/plants12020294), 2023-01-08
Supplement: s1 [file s1]

**Table S1.** Statistical differences for cytotoxic activity of *Ganoderma applanatum* extracts and ganoderic acid A; (5-100 µg/mL) to prostate cell line panel – DU145, PC3, PNT2

| <b>E1– control extract DU145</b> | 5 µg/mL         | 10 µg/mL | 20 µg/mL | 30 µg/mL | 40 µg/mL | 50 µg/mL | 100 µg/mL |
|----------------------------------|-----------------|----------|----------|----------|----------|----------|-----------|
| 5 µg/mL                          |                 |          |          |          |          |          |           |
| 10 µg/mL                         |                 |          |          |          |          |          |           |
| 20 µg/mL                         |                 |          |          |          |          |          |           |
| 30 µg/mL                         |                 |          |          |          |          |          |           |
| 40 µg/mL                         |                 |          |          |          |          |          |           |
| 50 µg/mL                         |                 |          |          |          |          |          |           |
| 100 µg/mL                        |                 |          |          |          |          |          |           |
|                                  | Not significant |          | P<0.05   |          | P<0.01   |          | P<0.001   |

| <b>E2 – extract after elicitation DU145</b> | 5 µg/mL         | 10 µg/mL | 20 µg/mL | 30 µg/mL | 40 µg/mL | 50 µg/mL | 100 µg/mL |
|---------------------------------------------|-----------------|----------|----------|----------|----------|----------|-----------|
| 5 µg/mL                                     |                 |          |          |          |          |          |           |
| 10 µg/mL                                    |                 |          |          |          |          |          |           |
| 20 µg/mL                                    |                 |          |          |          |          |          |           |
| 30 µg/mL                                    |                 |          |          |          |          |          |           |
| 40 µg/mL                                    |                 |          |          |          |          |          |           |
| 50 µg/mL                                    |                 |          |          |          |          |          |           |
| 100 µg/mL                                   |                 |          |          |          |          |          |           |
|                                             | Not significant |          | P<0.05   |          | P<0.01   |          | P<0.001   |

| <b>Ganoderic acid A DU145</b> | 5 µg/mL | 10 µg/mL | 20 µg/mL | 30 µg/mL | 40 µg/mL | 50 µg/mL | 100 µg/mL |
|-------------------------------|---------|----------|----------|----------|----------|----------|-----------|
| 5 µg/mL                       |         |          |          |          |          |          |           |

|           |                 |  |        |  |        |  |         |
|-----------|-----------------|--|--------|--|--------|--|---------|
| 10 µg/mL  |                 |  |        |  |        |  |         |
| 20 µg/mL  |                 |  |        |  |        |  |         |
| 30 µg/mL  |                 |  |        |  |        |  |         |
| 40 µg/mL  |                 |  |        |  |        |  |         |
| 50 µg/mL  |                 |  |        |  |        |  |         |
| 100 µg/mL |                 |  |        |  |        |  |         |
|           | Not significant |  | P<0.05 |  | P<0.01 |  | P<0.001 |

| <b>E1– control extract PC3</b> | 5 µg/mL         | 10 µg/mL | 20 µg/mL | 30 µg/mL | 40 µg/mL | 50 µg/mL | 100 µg/mL |
|--------------------------------|-----------------|----------|----------|----------|----------|----------|-----------|
| 5 µg/mL                        |                 |          |          |          |          |          |           |
| 10 µg/mL                       |                 |          |          |          |          |          |           |
| 20 µg/mL                       |                 |          |          |          |          |          |           |
| 30 µg/mL                       |                 |          |          |          |          |          |           |
| 40 µg/mL                       |                 |          |          |          |          |          |           |
| 50 µg/mL                       |                 |          |          |          |          |          |           |
| 100 µg/mL                      |                 |          |          |          |          |          |           |
|                                | Not significant |          | P<0.05   |          | P<0.01   |          | P<0.001   |

| <b>E2 – extract after elicitation PC3</b> | 5 µg/mL         | 10 µg/mL | 20 µg/mL | 30 µg/mL | 40 µg/mL | 50 µg/mL | 100 µg/mL |
|-------------------------------------------|-----------------|----------|----------|----------|----------|----------|-----------|
| 5 µg/mL                                   |                 |          |          |          |          |          |           |
| 10 µg/mL                                  |                 |          |          |          |          |          |           |
| 20 µg/mL                                  |                 |          |          |          |          |          |           |
| 30 µg/mL                                  |                 |          |          |          |          |          |           |
| 40 µg/mL                                  |                 |          |          |          |          |          |           |
| 50 µg/mL                                  |                 |          |          |          |          |          |           |
| 100 µg/mL                                 |                 |          |          |          |          |          |           |
|                                           | Not significant |          | P<0.05   |          | P<0.01   |          | P<0.001   |

| <b>Ganoderic acid A PC3</b> | 5 µg/mL         | 10 µg/mL | 20 µg/mL | 30 µg/mL | 40 µg/mL | 50 µg/mL | 100 µg/mL |
|-----------------------------|-----------------|----------|----------|----------|----------|----------|-----------|
| 5 µg/mL                     |                 |          |          |          |          |          |           |
| 10 µg/mL                    |                 |          |          |          |          |          |           |
| 20 µg/mL                    |                 |          |          |          |          |          |           |
| 30 µg/mL                    |                 |          |          |          |          |          |           |
| 40 µg/mL                    |                 |          |          |          |          |          |           |
| 50 µg/mL                    |                 |          |          |          |          |          |           |
| 100 µg/mL                   |                 |          |          |          |          |          |           |
|                             | Not significant |          | P<0.05   |          | P<0.01   |          | P<0.001   |

| <b>E1– control extract PNT2</b> | 5 µg/mL         | 10 µg/mL | 20 µg/mL | 30 µg/mL | 40 µg/mL | 50 µg/mL | 100 µg/mL |
|---------------------------------|-----------------|----------|----------|----------|----------|----------|-----------|
| 5 µg/mL                         |                 |          |          |          |          |          |           |
| 10 µg/mL                        |                 |          |          |          |          |          |           |
| 20 µg/mL                        |                 |          |          |          |          |          |           |
| 30 µg/mL                        |                 |          |          |          |          |          |           |
| 40 µg/mL                        |                 |          |          |          |          |          |           |
| 50 µg/mL                        |                 |          |          |          |          |          |           |
| 100 µg/mL                       |                 |          |          |          |          |          |           |
|                                 | Not significant |          | P<0.05   |          | P<0.01   |          | P<0.001   |

| <b>E2 – extract after elicitation PNT2</b> | 5 µg/mL | 10 µg/mL | 20 µg/mL | 30 µg/mL | 40 µg/mL | 50 µg/mL | 100 µg/mL |
|--------------------------------------------|---------|----------|----------|----------|----------|----------|-----------|
| 5 µg/mL                                    |         |          |          |          |          |          |           |
| 10 µg/mL                                   |         |          |          |          |          |          |           |
| 20 µg/mL                                   |         |          |          |          |          |          |           |

|           |                 |  |        |  |        |  |         |
|-----------|-----------------|--|--------|--|--------|--|---------|
| 30 µg/mL  |                 |  |        |  |        |  |         |
| 40 µg/mL  |                 |  |        |  |        |  |         |
| 50 µg/mL  |                 |  |        |  |        |  |         |
| 100 µg/mL |                 |  |        |  |        |  |         |
|           | Not significant |  | P<0.05 |  | P<0.01 |  | P<0.001 |

| <b>Ganoderic acid A</b><br><b>PNT2</b> | 5 µg/mL         | 10 µg/mL | 20 µg/mL | 30 µg/mL | 40 µg/mL | 50 µg/mL | 100 µg/mL |
|----------------------------------------|-----------------|----------|----------|----------|----------|----------|-----------|
| 5 µg/mL                                |                 |          |          |          |          |          |           |
| 10 µg/mL                               |                 |          |          |          |          |          |           |
| 20 µg/mL                               |                 |          |          |          |          |          |           |
| 30 µg/mL                               |                 |          |          |          |          |          |           |
| 40 µg/mL                               |                 |          |          |          |          |          |           |
| 50 µg/mL                               |                 |          |          |          |          |          |           |
| 100 µg/mL                              |                 |          |          |          |          |          |           |
|                                        | Not significant |          | P<0.05   |          | P<0.01   |          | P<0.001   |
