# Supplementary material for: Effect of Methyl Jasmonate Elicitation on Triterpene Production and Evaluation of Cytotoxic Activity of Mycelial Culture Extracts of Ganoderma applanatum (Pers.) Pat.
Source: MDPI journal article supplement (doi:10.3390/plants12020294), 2023-01-08
Supplement: s1 [file s1]

**Table S2.** Statistical differences for cytotoxic activity of *Ganoderma applanatum* extracts and ganoderic acid A; (5-100 µg/mL) to skin cell line panel – A375, HTB140, HaCaT

| <b>E1– control extract A375</b> | 5 µg/mL         | 10 µg/mL | 20 µg/mL | 30 µg/mL | 40 µg/mL | 50 µg/mL | 100 µg/mL |
|---------------------------------|-----------------|----------|----------|----------|----------|----------|-----------|
| 5 µg/mL                         |                 |          |          |          |          |          |           |
| 10 µg/mL                        |                 |          |          |          |          |          |           |
| 20 µg/mL                        |                 |          |          |          |          |          |           |
| 30 µg/mL                        |                 |          |          |          |          |          |           |
| 40 µg/mL                        |                 |          |          |          |          |          |           |
| 50 µg/mL                        |                 |          |          |          |          |          |           |
| 100 µg/mL                       |                 |          |          |          |          |          |           |
|                                 | Not significant |          | P<0.05   |          | P<0.01   |          | P<0.001   |

| <b>E2 – extract after elicitation A375</b> | 5 µg/mL         | 10 µg/mL | 20 µg/mL | 30 µg/mL | 40 µg/mL | 50 µg/mL | 100 µg/mL |
|--------------------------------------------|-----------------|----------|----------|----------|----------|----------|-----------|
| 5 µg/mL                                    |                 |          |          |          |          |          |           |
| 10 µg/mL                                   |                 |          |          |          |          |          |           |
| 20 µg/mL                                   |                 |          |          |          |          |          |           |
| 30 µg/mL                                   |                 |          |          |          |          |          |           |
| 40 µg/mL                                   |                 |          |          |          |          |          |           |
| 50 µg/mL                                   |                 |          |          |          |          |          |           |
| 100 µg/mL                                  |                 |          |          |          |          |          |           |
|                                            | Not significant |          | P<0.05   |          | P<0.01   |          | P<0.001   |

| <b>Ganoderic acid A A375</b> | 5 µg/mL | 10 µg/mL | 20 µg/mL | 30 µg/mL | 40 µg/mL | 50 µg/mL | 100 µg/mL |
|------------------------------|---------|----------|----------|----------|----------|----------|-----------|
| 5 µg/mL                      |         |          |          |          |          |          |           |
| 10 µg/mL                     |         |          |          |          |          |          |           |

|           |                 |  |        |  |        |  |         |
|-----------|-----------------|--|--------|--|--------|--|---------|
| 20 µg/mL  |                 |  |        |  |        |  |         |
| 30 µg/mL  |                 |  |        |  |        |  |         |
| 40 µg/mL  |                 |  |        |  |        |  |         |
| 50 µg/mL  |                 |  |        |  |        |  |         |
| 100 µg/mL |                 |  |        |  |        |  |         |
|           | Not significant |  | P<0.05 |  | P<0.01 |  | P<0.001 |

|                                   |                 |          |          |          |          |          |           |
|-----------------------------------|-----------------|----------|----------|----------|----------|----------|-----------|
| <b>E1– control extract HTB140</b> | 5 µg/mL         | 10 µg/mL | 20 µg/mL | 30 µg/mL | 40 µg/mL | 50 µg/mL | 100 µg/mL |
| 5 µg/mL                           |                 |          |          |          |          |          |           |
| 10 µg/mL                          |                 |          |          |          |          |          |           |
| 20 µg/mL                          |                 |          |          |          |          |          |           |
| 30 µg/mL                          |                 |          |          |          |          |          |           |
| 40 µg/mL                          |                 |          |          |          |          |          |           |
| 50 µg/mL                          |                 |          |          |          |          |          |           |
| 100 µg/mL                         |                 |          |          |          |          |          |           |
|                                   | Not significant |          | P<0.05   |          | P<0.01   |          | P<0.001   |

|                                              |                 |          |          |          |          |          |           |
|----------------------------------------------|-----------------|----------|----------|----------|----------|----------|-----------|
| <b>E2 – extract after elicitation HTB140</b> | 5 µg/mL         | 10 µg/mL | 20 µg/mL | 30 µg/mL | 40 µg/mL | 50 µg/mL | 100 µg/mL |
| 5 µg/mL                                      |                 |          |          |          |          |          |           |
| 10 µg/mL                                     |                 |          |          |          |          |          |           |
| 20 µg/mL                                     |                 |          |          |          |          |          |           |
| 30 µg/mL                                     |                 |          |          |          |          |          |           |
| 40 µg/mL                                     |                 |          |          |          |          |          |           |
| 50 µg/mL                                     |                 |          |          |          |          |          |           |
| 100 µg/mL                                    |                 |          |          |          |          |          |           |
|                                              | Not significant |          | P<0.05   |          | P<0.01   |          | P<0.001   |

| <b>Ganoderic acid A</b> | 5 µg/mL         | 10 µg/mL | 20 µg/mL | 30 µg/mL | 40 µg/mL | 50 µg/mL | 100 µg/mL |
|-------------------------|-----------------|----------|----------|----------|----------|----------|-----------|
| HTB140                  |                 |          |          |          |          |          |           |
| 5 µg/mL                 |                 |          |          |          |          |          |           |
| 10 µg/mL                |                 |          |          |          |          |          |           |
| 20 µg/mL                |                 |          |          |          |          |          |           |
| 30 µg/mL                |                 |          |          |          |          |          |           |
| 40 µg/mL                |                 |          |          |          |          |          |           |
| 50 µg/mL                |                 |          |          |          |          |          |           |
| 100 µg/mL               |                 |          |          |          |          |          |           |
|                         | Not significant |          | P<0.05   |          | P<0.01   |          | P<0.001   |

| <b>E1- control extract</b> | 5 µg/mL         | 10 µg/mL | 20 µg/mL | 30 µg/mL | 40 µg/mL | 50 µg/mL | 100 µg/mL |
|----------------------------|-----------------|----------|----------|----------|----------|----------|-----------|
| HaCaT                      |                 |          |          |          |          |          |           |
| 5 µg/mL                    |                 |          |          |          |          |          |           |
| 10 µg/mL                   |                 |          |          |          |          |          |           |
| 20 µg/mL                   |                 |          |          |          |          |          |           |
| 30 µg/mL                   |                 |          |          |          |          |          |           |
| 40 µg/mL                   |                 |          |          |          |          |          |           |
| 50 µg/mL                   |                 |          |          |          |          |          |           |
| 100 µg/mL                  |                 |          |          |          |          |          |           |
|                            | Not significant |          | P<0.05   |          | P<0.01   |          | P<0.001   |

| <b>E2 – extract after elicitation</b> | 5 µg/mL | 10 µg/mL | 20 µg/mL | 30 µg/mL | 40 µg/mL | 50 µg/mL | 100 µg/mL |
|---------------------------------------|---------|----------|----------|----------|----------|----------|-----------|
| HaCaT                                 |         |          |          |          |          |          |           |
| 5 µg/mL                               |         |          |          |          |          |          |           |
| 10 µg/mL                              |         |          |          |          |          |          |           |

|           |                 |  |        |  |        |  |         |
|-----------|-----------------|--|--------|--|--------|--|---------|
| 20 µg/mL  |                 |  |        |  |        |  |         |
| 30 µg/mL  |                 |  |        |  |        |  |         |
| 40 µg/mL  |                 |  |        |  |        |  |         |
| 50 µg/mL  |                 |  |        |  |        |  |         |
| 100 µg/mL |                 |  |        |  |        |  |         |
|           | Not significant |  | P<0.05 |  | P<0.01 |  | P<0.001 |

| <b>Ganoderic acid A</b><br><b>HaCaT</b> | 5 µg/mL         | 10 µg/mL | 20 µg/mL | 30 µg/mL | 40 µg/mL | 50 µg/mL | 100 µg/mL |
|-----------------------------------------|-----------------|----------|----------|----------|----------|----------|-----------|
| 5 µg/mL                                 |                 |          |          |          |          |          |           |
| 10 µg/mL                                |                 |          |          |          |          |          |           |
| 20 µg/mL                                |                 |          |          |          |          |          |           |
| 30 µg/mL                                |                 |          |          |          |          |          |           |
| 40 µg/mL                                |                 |          |          |          |          |          |           |
| 50 µg/mL                                |                 |          |          |          |          |          |           |
| 100 µg/mL                               |                 |          |          |          |          |          |           |
|                                         | Not significant |          | P<0.05   |          | P<0.01   |          | P<0.001   |
