# Supplementary material for: Effect of Methyl Jasmonate Elicitation on Triterpene Production and Evaluation of Cytotoxic Activity of Mycelial Culture Extracts of Ganoderma applanatum (Pers.) Pat.
Source: MDPI journal article supplement (doi:10.3390/plants12020294), 2023-01-08
Supplement: s1 [file s1]

**Table S3.** Statistical differences for cytotoxic activity of *Ganoderma applanatum* extracts and ganoderic acid A; (5-100 µg/mL) to gastrointestinal tract cell lines panel – Caco-2, HT29, HepG2

| <b>E1– control extract Caco-2</b> | 5 µg/mL         | 10 µg/mL | 20 µg/mL | 30 µg/mL | 40 µg/mL | 50 µg/mL | 100 µg/mL |
|-----------------------------------|-----------------|----------|----------|----------|----------|----------|-----------|
| 5 µg/mL                           |                 |          |          |          |          |          |           |
| 10 µg/mL                          |                 |          |          |          |          |          |           |
| 20 µg/mL                          |                 |          |          |          |          |          |           |
| 30 µg/mL                          |                 |          |          |          |          |          |           |
| 40 µg/mL                          |                 |          |          |          |          |          |           |
| 50 µg/mL                          |                 |          |          |          |          |          |           |
| 100 µg/mL                         |                 |          |          |          |          |          |           |
|                                   | Not significant |          | P<0.05   |          | P<0.01   |          | P<0.001   |

| <b>E2 – extract after elicitation Caco-2</b> | 5 µg/mL         | 10 µg/mL | 20 µg/mL | 30 µg/mL | 40 µg/mL | 50 µg/mL | 100 µg/mL |
|----------------------------------------------|-----------------|----------|----------|----------|----------|----------|-----------|
| 5 µg/mL                                      |                 |          |          |          |          |          |           |
| 10 µg/mL                                     |                 |          |          |          |          |          |           |
| 20 µg/mL                                     |                 |          |          |          |          |          |           |
| 30 µg/mL                                     |                 |          |          |          |          |          |           |
| 40 µg/mL                                     |                 |          |          |          |          |          |           |
| 50 µg/mL                                     |                 |          |          |          |          |          |           |
| 100 µg/mL                                    |                 |          |          |          |          |          |           |
|                                              | Not significant |          | P<0.05   |          | P<0.01   |          | P<0.001   |

| <b>Ganoderic acid A Caco-2</b> | 5 µg/mL | 10 µg/mL | 20 µg/mL | 30 µg/mL | 40 µg/mL | 50 µg/mL | 100 µg/mL |
|--------------------------------|---------|----------|----------|----------|----------|----------|-----------|
| 5 µg/mL                        |         |          |          |          |          |          |           |

|           |                 |  |        |  |        |  |         |
|-----------|-----------------|--|--------|--|--------|--|---------|
| 10 µg/mL  |                 |  |        |  |        |  |         |
| 20 µg/mL  |                 |  |        |  |        |  |         |
| 30 µg/mL  |                 |  |        |  |        |  |         |
| 40 µg/mL  |                 |  |        |  |        |  |         |
| 50 µg/mL  |                 |  |        |  |        |  |         |
| 100 µg/mL |                 |  |        |  |        |  |         |
|           | Not significant |  | P<0.05 |  | P<0.01 |  | P<0.001 |

|                                  |                 |          |          |          |          |          |           |
|----------------------------------|-----------------|----------|----------|----------|----------|----------|-----------|
| <b>E1– control extract HT-29</b> | 5 µg/mL         | 10 µg/mL | 20 µg/mL | 30 µg/mL | 40 µg/mL | 50 µg/mL | 100 µg/mL |
| 5 µg/mL                          |                 |          |          |          |          |          |           |
| 10 µg/mL                         |                 |          |          |          |          |          |           |
| 20 µg/mL                         |                 |          |          |          |          |          |           |
| 30 µg/mL                         |                 |          |          |          |          |          |           |
| 40 µg/mL                         |                 |          |          |          |          |          |           |
| 50 µg/mL                         |                 |          |          |          |          |          |           |
| 100 µg/mL                        |                 |          |          |          |          |          |           |
|                                  | Not significant |          | P<0.05   |          | P<0.01   |          | P<0.001   |

|                                             |         |          |          |          |          |          |           |
|---------------------------------------------|---------|----------|----------|----------|----------|----------|-----------|
| <b>E2 – extract after elicitation HT-29</b> | 5 µg/mL | 10 µg/mL | 20 µg/mL | 30 µg/mL | 40 µg/mL | 50 µg/mL | 100 µg/mL |
| 5 µg/mL                                     |         |          |          |          |          |          |           |
| 10 µg/mL                                    |         |          |          |          |          |          |           |
| 20 µg/mL                                    |         |          |          |          |          |          |           |
| 30 µg/mL                                    |         |          |          |          |          |          |           |
| 40 µg/mL                                    |         |          |          |          |          |          |           |
| 50 µg/mL                                    |         |          |          |          |          |          |           |
| 100 µg/mL                                   |         |          |          |          |          |          |           |

|  |                 |  |        |  |        |  |         |
|--|-----------------|--|--------|--|--------|--|---------|
|  | Not significant |  | P<0.05 |  | P<0.01 |  | P<0.001 |
|--|-----------------|--|--------|--|--------|--|---------|

| <b>Ganoderic acid<br/>A HT-29</b> | 5 µg/mL         | 10 µg/mL | 20 µg/mL | 30 µg/mL | 40 µg/mL | 50 µg/mL | 100 µg/mL |
|-----------------------------------|-----------------|----------|----------|----------|----------|----------|-----------|
| 5 µg/mL                           |                 |          |          |          |          |          |           |
| 10 µg/mL                          |                 |          |          |          |          |          |           |
| 20 µg/mL                          |                 |          |          |          |          |          |           |
| 30 µg/mL                          |                 |          |          |          |          |          |           |
| 40 µg/mL                          |                 |          |          |          |          |          |           |
| 50 µg/mL                          |                 |          |          |          |          |          |           |
| 100 µg/mL                         |                 |          |          |          |          |          |           |
|                                   | Not significant |          | P<0.05   |          | P<0.01   |          | P<0.001   |

| <b>E1– control extract<br/>HepG2</b> | 5 µg/mL         | 10 µg/mL | 20 µg/mL | 30 µg/mL | 40 µg/mL | 50 µg/mL | 100 µg/mL |
|--------------------------------------|-----------------|----------|----------|----------|----------|----------|-----------|
| 5 µg/mL                              |                 |          |          |          |          |          |           |
| 10 µg/mL                             |                 |          |          |          |          |          |           |
| 20 µg/mL                             |                 |          |          |          |          |          |           |
| 30 µg/mL                             |                 |          |          |          |          |          |           |
| 40 µg/mL                             |                 |          |          |          |          |          |           |
| 50 µg/mL                             |                 |          |          |          |          |          |           |
| 100 µg/mL                            |                 |          |          |          |          |          |           |
|                                      | Not significant |          | P<0.05   |          | P<0.01   |          | P<0.001   |

| <b>E2 – extract after<br/>elicitation HepG2</b> | 5 µg/mL | 10 µg/mL | 20 µg/mL | 30 µg/mL | 40 µg/mL | 50 µg/mL | 100 µg/mL |
|-------------------------------------------------|---------|----------|----------|----------|----------|----------|-----------|
| 5 µg/mL                                         |         |          |          |          |          |          |           |

|           |                 |  |        |  |        |  |         |
|-----------|-----------------|--|--------|--|--------|--|---------|
| 10 µg/mL  |                 |  |        |  |        |  |         |
| 20 µg/mL  |                 |  |        |  |        |  |         |
| 30 µg/mL  |                 |  |        |  |        |  |         |
| 40 µg/mL  |                 |  |        |  |        |  |         |
| 50 µg/mL  |                 |  |        |  |        |  |         |
| 100 µg/mL |                 |  |        |  |        |  |         |
|           | Not significant |  | P<0.05 |  | P<0.01 |  | P<0.001 |

| <b>Ganoderic acid A</b> | 5 µg/mL         | 10 µg/mL | 20 µg/mL | 30 µg/mL | 40 µg/mL | 50 µg/mL | 100 µg/mL |
|-------------------------|-----------------|----------|----------|----------|----------|----------|-----------|
| 5 µg/mL                 |                 |          |          |          |          |          |           |
| 10 µg/mL                |                 |          |          |          |          |          |           |
| 20 µg/mL                |                 |          |          |          |          |          |           |
| 30 µg/mL                |                 |          |          |          |          |          |           |
| 40 µg/mL                |                 |          |          |          |          |          |           |
| 50 µg/mL                |                 |          |          |          |          |          |           |
| 100 µg/mL               |                 |          |          |          |          |          |           |
|                         | Not significant |          | P<0.05   |          | P<0.01   |          | P<0.001   |
